# Supplementary material
Source: PubMed Central journal article supplement (PMC6397541)
Supplement: pnas.1815126116.sapp.pdf [file pnas.1815126116.sapp.pdf]

## **SI Appendix Material and Methods (Analysis of human samples)**

### **Immunohistochemistry (IHC)**

Breast preneoplastic and tumor tissues were obtained from women carrying BRCA1/2 mutations. Control breast tissue samples were acquired from anonymous premenopausal women undergoing reduction mastectomy at the University Hospital of Bellvitge, IDIBELL. IHC was performed as previously described(1). Tissue samples were incubated overnight at 4°C with anti-amphiregulin primary Ab (16036-1 AP, Proteintech) at a dilution of 1:100. Specimens were viewed with a brightfield microscope (Leica DM2500 equipped with Micropublisher 3.3-QI imaging camera) using Q-Capture Pro Software and processed with Adobe Photoshop CS5.

For identification of human CD163-positive macrophages in human breast cancers, IHC was performed with CD163 primary antibody (MCA1853, Bio-Rad) as previously described(2). AREG positive regions were identified by pre-segmenting the images at 10x magnification using multiresolution segmentation in Definiens DeveloperXD (scale = 800, shape coefficient = 0.4, compactness coefficient = 0.1) and classified based on the object's mean intensity, the number of standard deviations from the image mean in AREG stain channel, its relative brightness compared to neighbour objects, and with shape morphometrics. AREG positive regions were grown by 20 pixels (~26µm) up to 100 pixels in order to fill gaps between very close AREG positive objects, to include immediately adjacent stroma, and to combine small regions of AREG positive epithelium that, in a 3D setting, would have come from the same structure. AREG negative regions were identified as any regions which was not AREG positive or one of the pixel-distance bins. Any misclassified regions were manually corrected. Images were captured with Olympus IX81 fluorescence microscope and processed with ZEN imaging software, CZI. Data were analyzed by GraphPad Prism 7.

For IHC staining of mouse KBP tumors, tissue specimens were incubated with primary Abs to detect amphiregulin (16036-1 AP, Proteintech), F4/80 (MCA497GAR, Bio-Rad), and CD31(AB28364, Abcam). For amphiregulin, we applied the same conditions as for human breast cancer specimen as described above. For F4/80 staining, antigen retrieval for performed with Proteinase K (PK) treatment at 37°C for 10 min. The primary Ab was prepared in 5% rabbit serum with 0,2% Triton X-100 at a dilution of 1:200 overnight at

4°C. Secondary Ab (Vector labs BA-4001) was incubated for 30 min at a dilution of 1:400. For IHC staining of CD31 positive cells tissue samples were incubated in 10mM Na Citrate (pH6) solution. The primary Ab was diluted at 1:50 dilution in DAKO Protein block and incubated for 45 minutes at room temperature. Secondary Ab (Jackson Labs) was diluted 1:400 and incubated for 45 minutes. In both cases, slides were digitized using a Nanozoomer2.0 HT-Hamamatsu (Olympus). An image analysis protocol (APP) was developed using Visiopharm software (Visiopharm, Denmark) to identify the area of IHC staining positive for F480 and CD31. A ratio of positive expression to region of interest was then calculated for each test group. In both human breast cancer and mouse tumor specimen, DAPI was used as nuclear staining.

### **Analysis of human breast cancer datasets**

The results published here are partly based upon data generated by TCGA managed by the National Cancer Institute (NCI) and the National Human Genome Research Institute (NHGRI). Information about TCGA can be found at <http://cancergenome.nih.gov>. HR-deficient BC cohort was defined by using TCGA breast cancer RNAseq data and somatic mutations after being obtained following approval by the Data Access Committee (project #11689). Mutational signatures were defined using the R mut Signatures package(3). The GSEA tool was run with default values for all parameters.

Gene expression differences stratified according to BRCA1 mRNA level were analyzed using preprocessed and normalized RNA-seq and microarray expression TCGA data (downloaded from the GDC data portal on 2016-04-22). For each gene, a logistic regression analysis was implemented to assess its association with the expression level of BRCA1, categorized in tertiles. Unadjusted and adjusted (with covariates of ERBB2, ESR1, and PGR expression) models were used, which provided similar estimations. Gene expression correlations were computed using Pearson's correlation coefficient, and p-values indicated the probability of independence. Data were normalized to log2 standard TCGA normalization. Rosetta microarray-derived gene expression data along with BRCA1 mutation status from the Van't Veer cohort were downloaded from <http://www.rii.com/publications/default.htm>(4). Because the expression profiles obtained were log-ratio data, no further normalization was performed. Comparison of AhR, CYP1A1, and CYP1A2 expression levels in BRCA1-mutated versus wild-type breast

tumors was performed using a two-tailed Mann-Whitney U test and GraphPad Prism Software.

PAM50 calls annotated in clinical data were used to identify primary breast tumors of the basal subtype (n=141) which were segregated into quartiles based on *AREG* mRNA levels. Candidate gene expression levels were then compared in tumors in the top and bottom quartiles. Expression profiles were subjected to single sample gene set enrichment analysis (ssGSEA) using the Broad's GenePattern tool to derive individual tumor enrichment scores for a panel of MSigDB gene-sets corresponding to the cellular response to oxidative stress (<http://software.broadinstitute.org/cancer/software/genepattern/>)(5, 6). The "Chuang\_oxidative\_stress\_response" gene set (ROS up-regulated genes only) displayed the greatest variance in ssGSEA enrichment scores across tumors and was chosen for subsequent analysis. Tumors were classified into quartiles based on their ssGSEA scores for this gene-set. AhR, CYP1B1, AREG, CCL5, CXCL1 and CXCL2 expression levels were then compared between tumors in the top and bottom quartiles, representing those with high and low responses to oxidative stress, respectively. All two-group statistical comparisons of gene expression levels were performed using a two-tailed Mann-Whitney U test and GraphPad Prism Software.

The immune cell content in tumors was inferred using the Microenvironment Cell Populations-counter method (7). These analyses and PCC computations were performed in R software.

The AHR and AHR-ARNT target gene sets were obtained from the TRANSFAC database(8). The expression signature scores were computed using the ssGSEA algorithm with standard parameters and using all genes included in each set. The Pearson's correlation coefficients and p-values were computed in R.

Cancer Cell Line Encyclopedia was used to investigate the expression of AhR in human breast cancer cell lines(9, 10). The cell lines were grouped into basal-like and non-basal-like based on the method previously described(11).

## SI Appendix Figure Legends

**Figure S1. AhR expression and activation in NRF2-deleted cells and BC with high ROS levels.** (A) AhR mRNA levels in human MCF10A cells left untreated (Ctr) or treated with 200 $\mu$ M BSO for 24h. (B) Representative images of immunofluorescence assay in COMMA-1D cells treated with 200 $\mu$ M BSO for 1h or left untreated (Ctr). Blue=nuclear staining with Dapi, Magenta=AhR staining. The cells contained in dashed rectangles are reported in Figure 1D as example of scoring criteria of low/undetectable or positive AhR nuclear signal. Scale bar=20 $\mu$ m. (C) Expression levels of Ahr exon2 in mouse MEC that were isolated from Ahr<sup>ff</sup> mice, infected with cre-expressing (+cre) or empty vector (-cre) adenoviruses and then left untreated (Ctr) or treated with 50  $\mu$ M BSO for 24hr before analysis. (D) Nrf2 mRNA levels of mouse MEC isolated from Nrf2<sup>-/-</sup> or Nrf2<sup>+/+</sup> mice. (E) AhR mRNA levels of mouse MEC as in (D). (F, G) Hmox1 and Nqo1 mRNA levels of mouse MEC as in (D). (H) Nrf2 mRNA levels of COMMA-1D cells transfected with non-targeting (scramble, Scr) or mouse Nrf2 (siNrf2) siRNA oligos. Cells were analyzed at 48h post-transfection. (I) mRNA analysis of AhR-target Cyp1a1 in COMMA-1D cells that were transfected with single guide RNA against mouse AhR (sgAhR) and siRNA oligos specific for mouse Nrf2 (siNrf2) and then subjected to BSO (200 $\mu$ M) for 24h. Cells manipulated with empty vector (EV) and non-targeting (scramble, scr) siRNA were used as control. n=3/group. (J) mRNA levels of Ahr, CYP1A1 and CYP1A2 in the Van't Veer human BC dataset with tumors segregated by BRCA1 genotype: Wild-type, n=21; Mutated, n=18. (K) Inverse correlation between AhR or CYP1B1 expression with low or high BRCA1 mRNA levels in the TCGA human BC dataset.

**Figure S2. Expression of AREG in normal and malignant mammary epithelial cells and analysis of Erbb receptors and ligands.** (A) Immunoblot showing AREG protein in MCF10A cells that were left untreated (Ctr) or treated with 200 $\mu$ M BSO for 24hr or 48hr. (B) mRNA expression of mouse Erbb receptors as indicated in COMMA-1D cells. n=3. (C) mRNA expression of mouse Erbb ligands as indicated in COMMA-1D cells that were left untreated or subjected to 200 $\mu$ M BSO for 24h. n=3/group. (D) Quantification of AREG expression in BRCA1 wild-type reduction mammaplasty from healthy women used as controls, prophylactic mastectomy specimen in women heterozygous for a BRCA1

mutation (BRCA1 mutant), and human BRCA1 mutant basal/TNBC breast tumours as shown in Figure 2J.

**Figure S3. AhR-AREG axis has a pivotal role in BRCA1-associated tumorigenesis.**

(A) mRNA levels of Nqo1 in KBP cells that were left untreated or treated with 200  $\mu$ M BSO for 24h. n=3/group. (B) Representative flow plots of DNA synthesis in KBP cells that were transfected with empty vector (EV), or vectors expressing sgAhr or sgAreg constructs, and examined at 24hr or 48hr after puromycin selection. (C) Representative images of EV-, sgAhr- or sgAreg- expressing KBP tumors (red arrows) in the mice on day 35 post-transplantation. (D) Growth curve of EV-, sgAhr- or sgAreg- expressing KBP cells by SRB colorimetric assay at different time points. (E) RNAseq data obtained from RNA deep sequencing of mouse MEC and KBP tumors (n=3/group). The lower and upper hinges correspond to the first and third quartiles (the 25th and 75th percentiles). The upper whisker extends from the hinge to the largest value no further than  $1.5 * IQR$  from the hinge, and the lower whisker extends from the hinge to the smallest value at most  $1.5 * IQR$  of the hinge (where IQR is the inter-quartile range, or distance between the first and third quartiles). (F) mRNA levels of Erbb ligands (Areg, Hbegf, Nrg1) in EV and sgAhr KBP tumors. n=3-5/group.

**Figure S4. Analysis of tumour-infiltrating macrophages and bone marrow derived macrophages.**

(A,B) Representative plots describing the gating strategy used to characterize macrophages in the mammary fat pad of virgin and nulliparous FVB female mice and KBP mammary tumors. (C) Histogram of phosphorylated EGFR (p-EGFR) signal in macrophages that were positive for CD11b and F4/80 surface markers (CD11b<sup>+</sup>F4/80<sup>+</sup>) in KBP tumors. Staining with isotype control was used to assess the specificity of the signal. (D) Left, representative image of the concentric regions “grown” from the area and at a distance spanning from 20pix to 100pix. Right, Quantification of CD163<sup>+</sup> macrophages at different distances from an AREG-positive tumour area. (E) ELISA measurement of secreted VEGF-A protein in the medium of BMDM cultured alone, or after co-culture with KBP cells for 24hr (n=3/group). (F) Vegfa mRNA levels in KBP cells alone (-) or after co-culturing with BMDM for 24 hr. (G) Egfr mRNA analysis in BMDM cultured alone, or after co-culture with KBP cells for 24hr (n=3/group).

Figure S5. **Analysis of monocyte- and macrophage-related chemokines in BRCA1/p53-deleted mammary tumors.** (A) Levels of the indicated chemokines in the culture medium of mouse MEC or KBP cells after 24hr culture (n=4/group). (B) Levels of the indicated chemokines in the culture medium of EV- or sgAhr-expressing KBP cells treated for 24hr with recombinant AREG (rAREG) at 50ng/ml. (C) Levels of CXCL1, CXCL2 and CCL5 mRNAs in TCGA BC grouped accordingly to low or high expression of BRCA1, AhR or AREG as indicated on the x-axis (n=1102).

Figure S6. **Effect of AhR loss-of-function in human breast cancer and mouse mammary tumors.** (A) mRNA levels of CYP1A1 in MDA-MB-468 cell line carrying a wild-type (AhR<sup>wt</sup>) or deleted form of AhR (AhR<sup>ko</sup>). Cells were left untreated (Ctr) or exposed to 500  $\mu$ M BSO for 24h. (B) Growth curve of MDA-MB-468 AhR<sup>wt</sup> and AhR<sup>ko</sup> cells for 4 days as measured by Tripin-blue exclusion assay. (C) Levels of secreted AREG in the media of the indicated cell lines that have been seeded and maintained in growth factor-rich media for 24h. (D,E) AREG levels in the culture medium of MDA-MB-468 and HCC1937 cell lines treated with increasing dose of the AhR inhibitor (AhRi), CH223191. (F) Immunoblot showing total EGFR, phosphorylated EGFR (P-EGFR) and AhR proteins in HCC1937 cells that were left untreated (Ctr) or treated with Erlotinib (E; 600nM) or AhRi (900nM) for 24 hr.

Figure S7. **Sensitivity of breast cancer cell lines to AhR and EGFR inhibition.** Synergy score plots as determined by analyzing data from 5-day SRB growth using the SynergyFinder web application. Red and green colors indicate the most synergistic or antagonist areas, respectively.

## REFERENCES

1. Gorrini C, *et al.* (2013) BRCA1 interacts with Nrf2 to regulate antioxidant signaling and cell survival. *J Exp Med* 210(8):1529-1544.
2. Qian BZ, *et al.* (2015) FLT1 signaling in metastasis-associated macrophages activates an inflammatory signature that promotes breast cancer metastasis. *J Exp Med* 212(9):1433-1448.
3. Alexandrov LB, Nik-Zainal S, Wedge DC, Campbell PJ, & Stratton MR (2013) Deciphering signatures of mutational processes operative in human cancer. *Cell Rep* 3(1):246-259.
4. van 't Veer LJ, *et al.* (2002) Gene expression profiling predicts clinical outcome of breast cancer. *Nature* 415(6871):530-536.
5. Subramanian A, *et al.* (2005) Gene set enrichment analysis: a knowledge-based approach for interpreting genome-wide expression profiles. *Proc Natl Acad Sci U S A* 102(43):15545-15550.
6. Barbie DA, *et al.* (2009) Systematic RNA interference reveals that oncogenic KRAS-driven cancers require TBK1. *Nature* 462(7269):108-112.
7. Becht E, *et al.* (2016) Estimating the population abundance of tissue-infiltrating immune and stromal cell populations using gene expression. *Genome Biol* 17(1):218.
8. Matys V, *et al.* (2006) TRANSFAC and its module TRANSCompel: transcriptional gene regulation in eukaryotes. *Nucleic Acids Res* 34(Database issue):D108-110.
9. Barretina J, *et al.* (2012) The Cancer Cell Line Encyclopedia enables predictive modelling of anticancer drug sensitivity. *Nature* 483(7391):603-607.
10. Cancer Cell Line Encyclopedia C & Genomics of Drug Sensitivity in Cancer C (2015) Pharmacogenomic agreement between two cancer cell line data sets. *Nature* 528(7580):84-87.
11. Thu KL, *et al.* (2018) Disruption of the anaphase-promoting complex confers resistance to TTK inhibitors in triple-negative breast cancer. *Proc Natl Acad Sci U S A* 115(7):E1570-E1577.

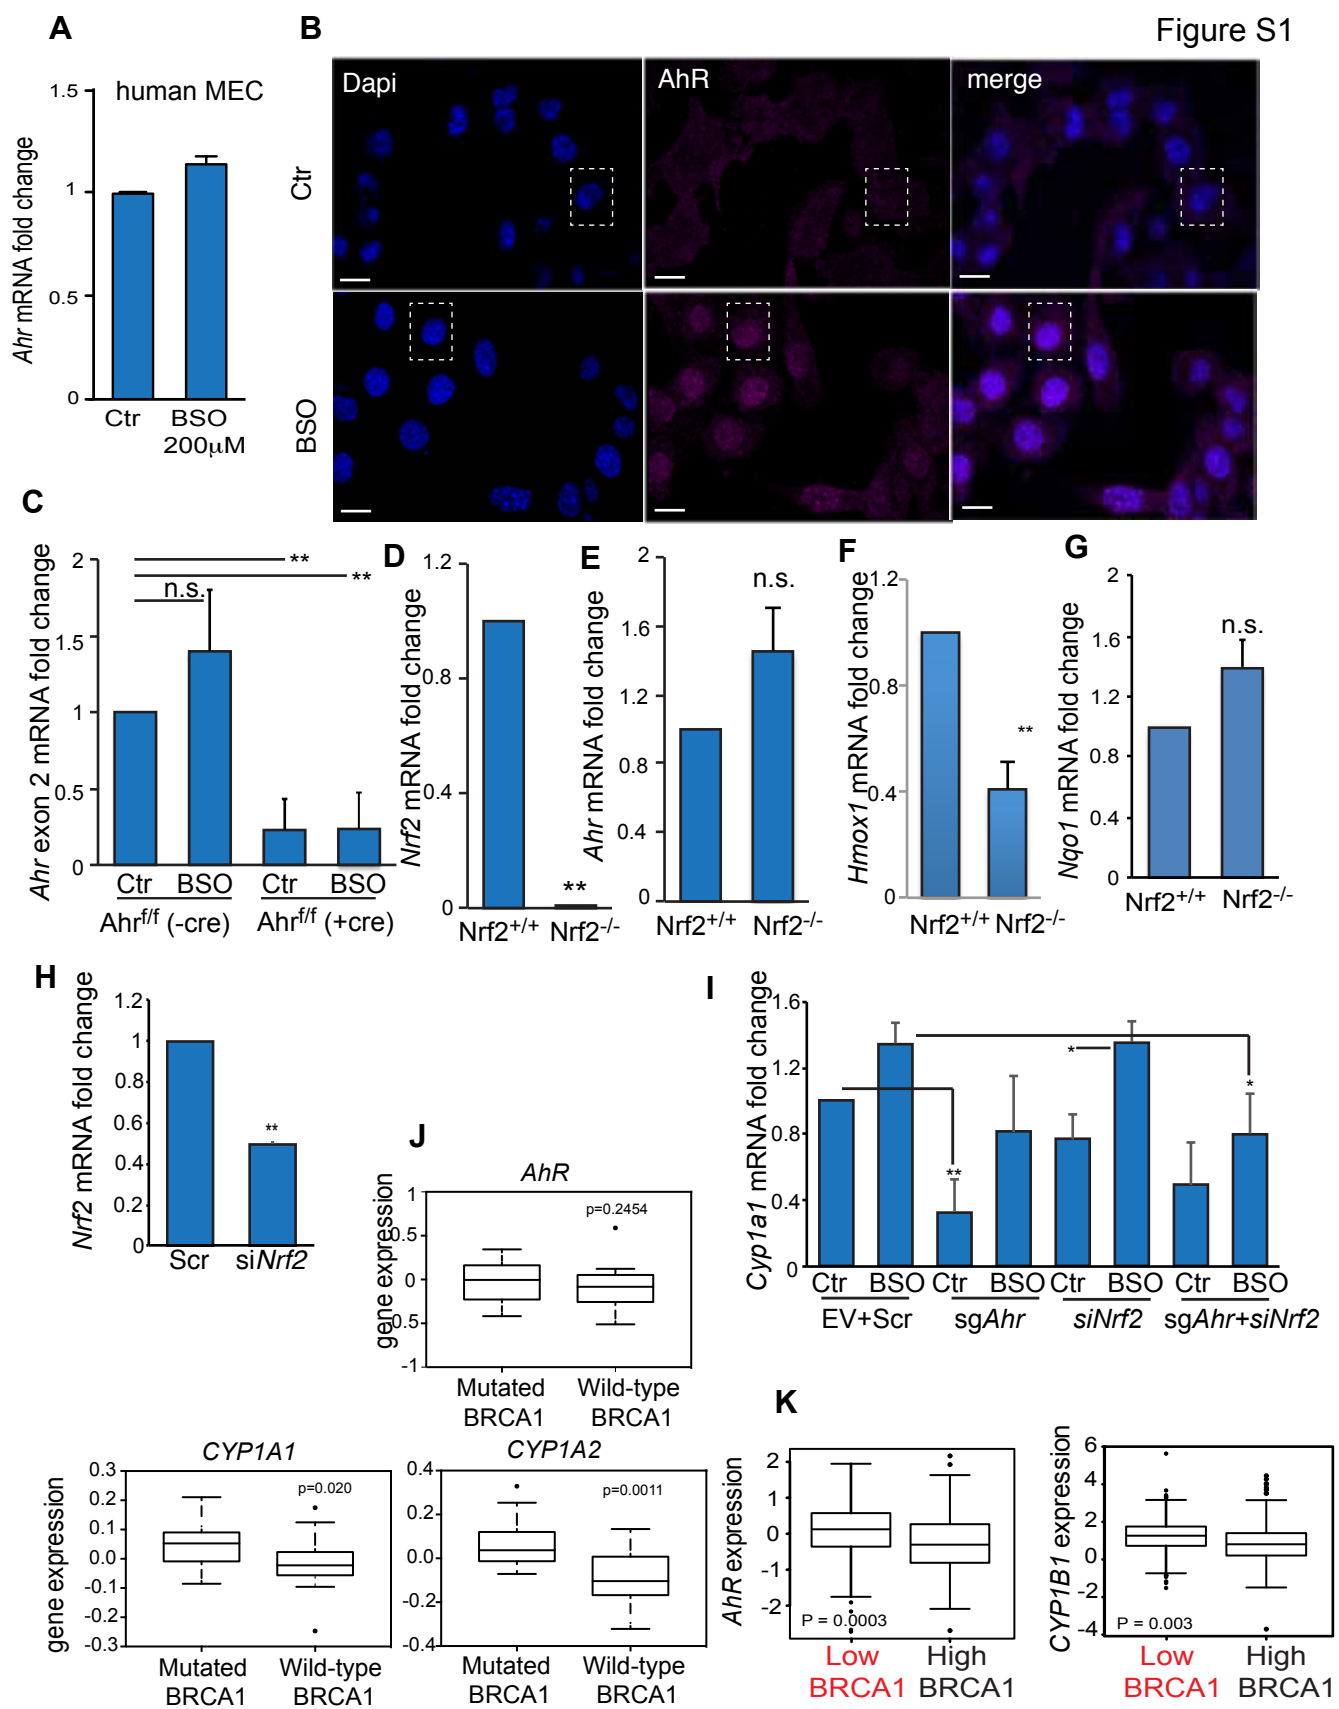



Figure 2

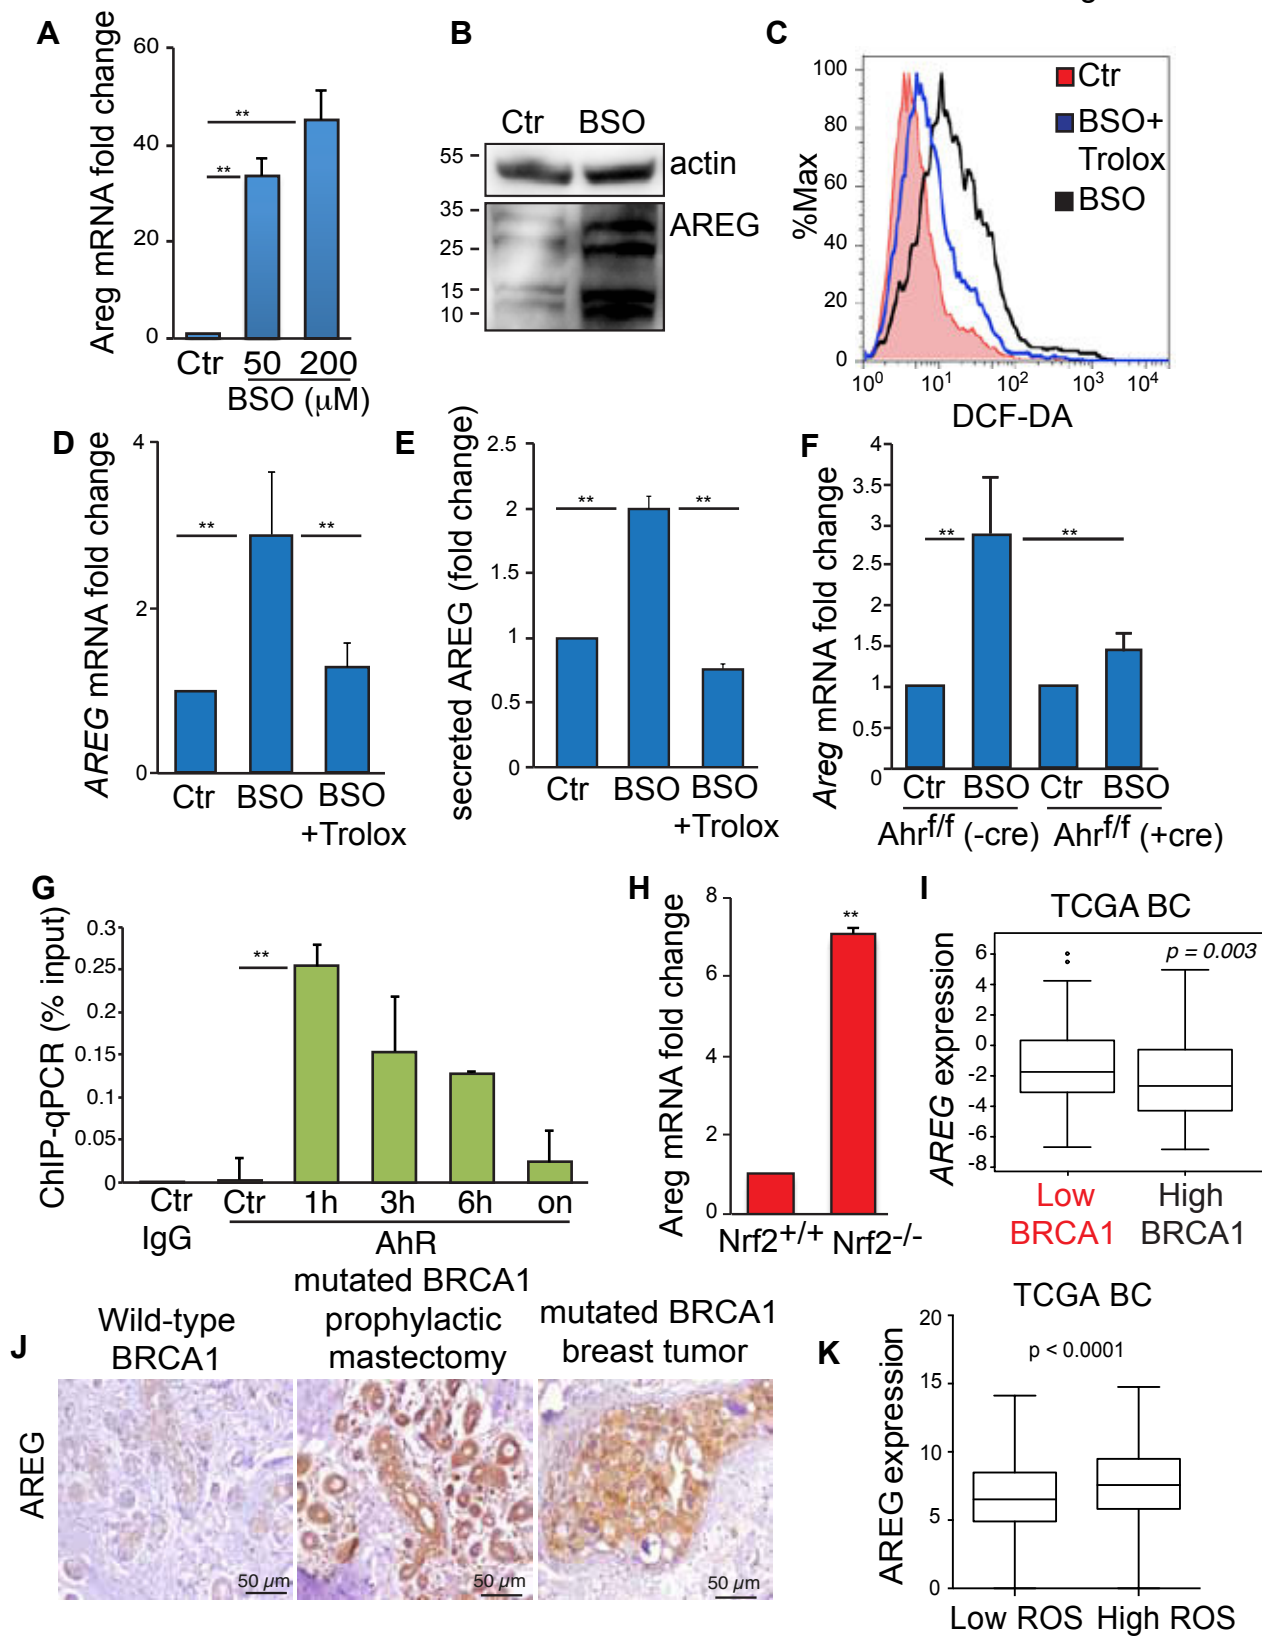

Figure S3

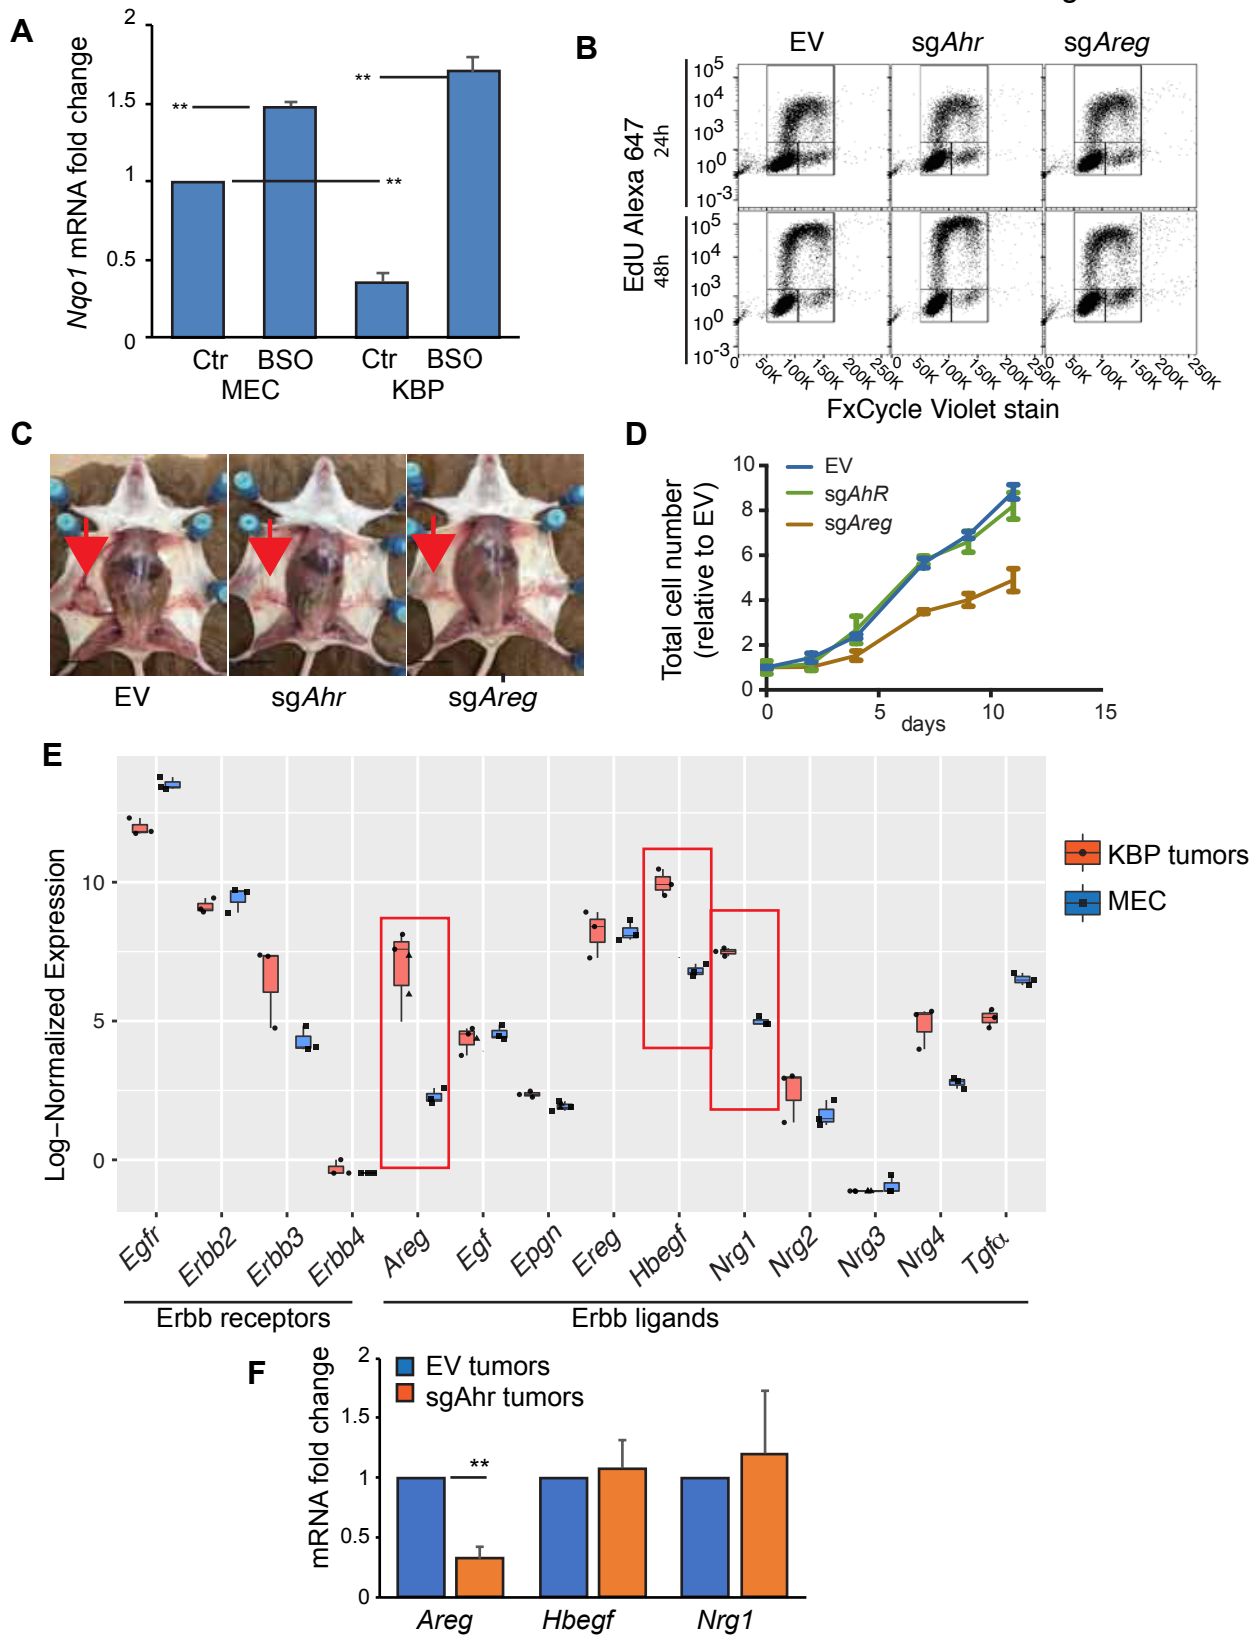

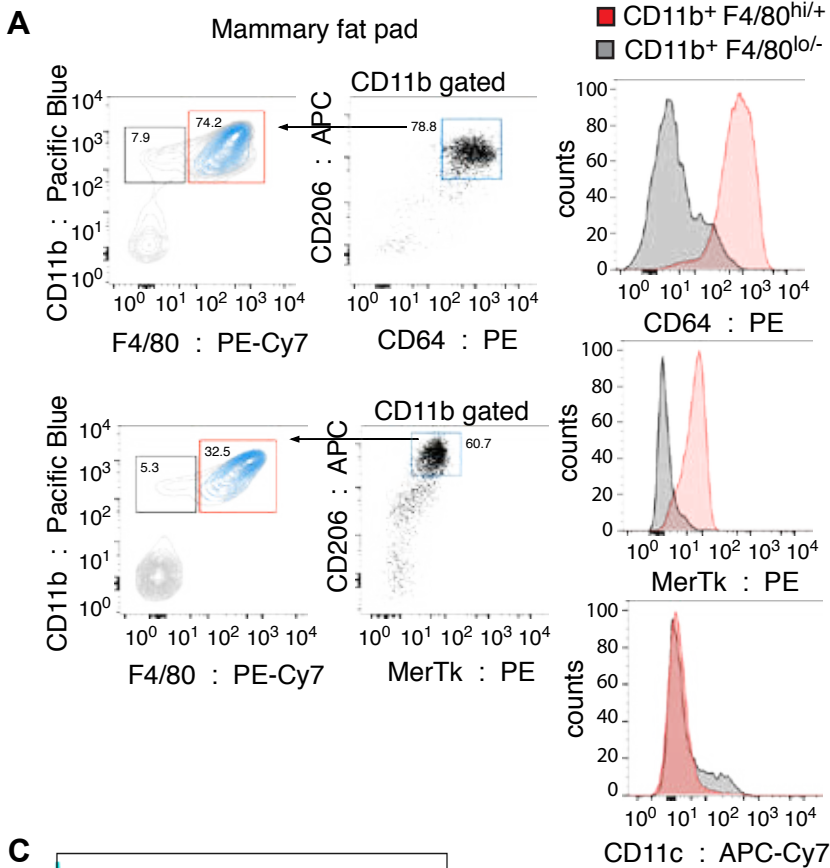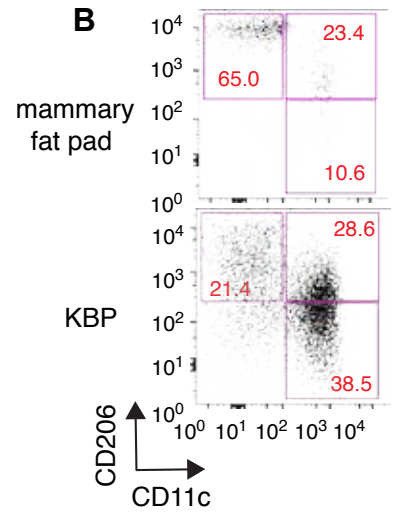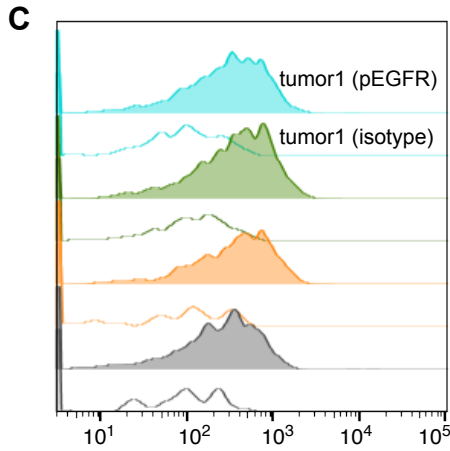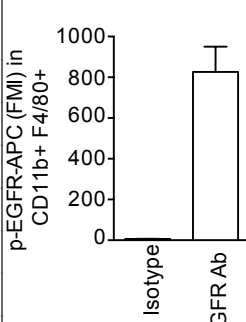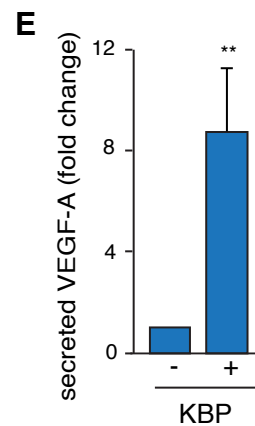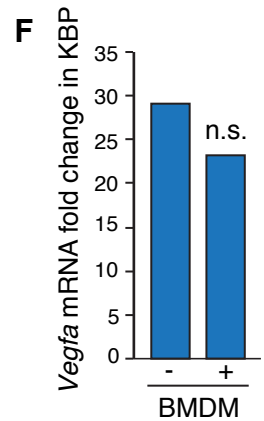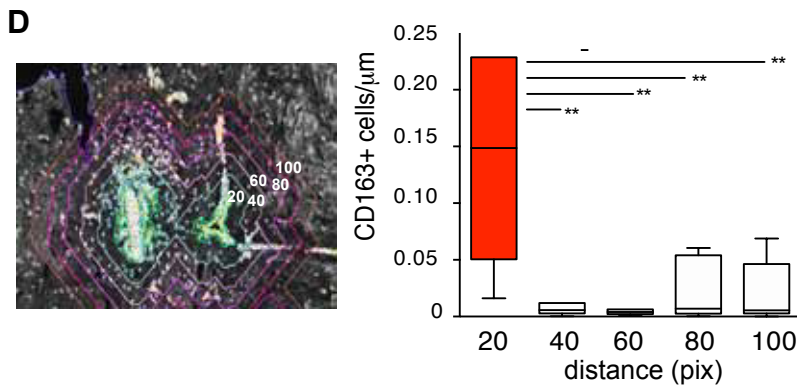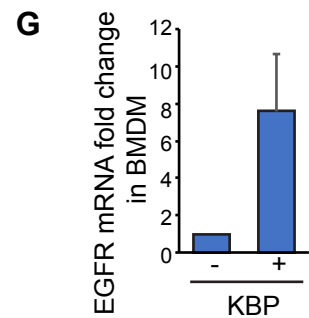

**A**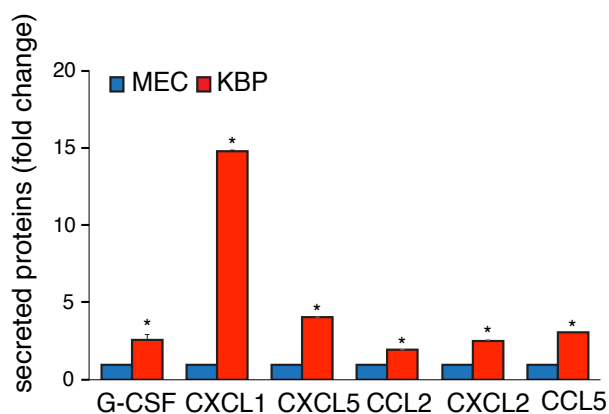**B**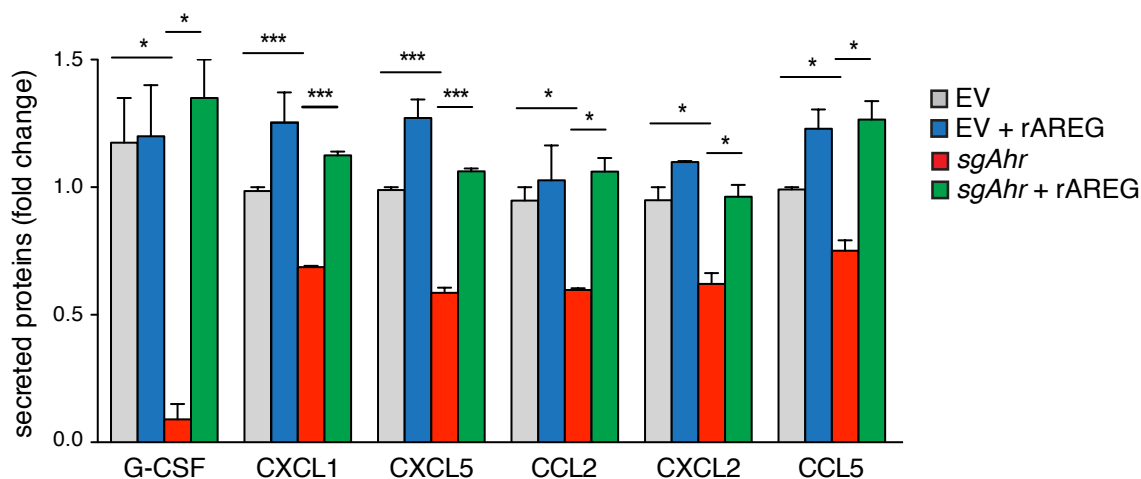**C**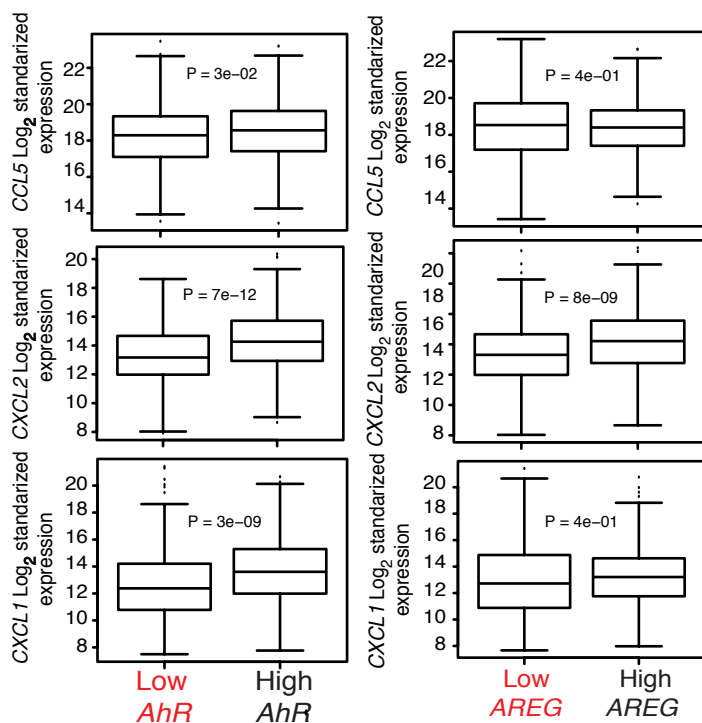**D**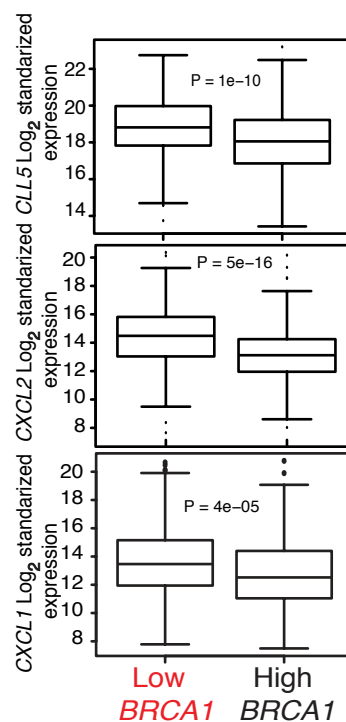

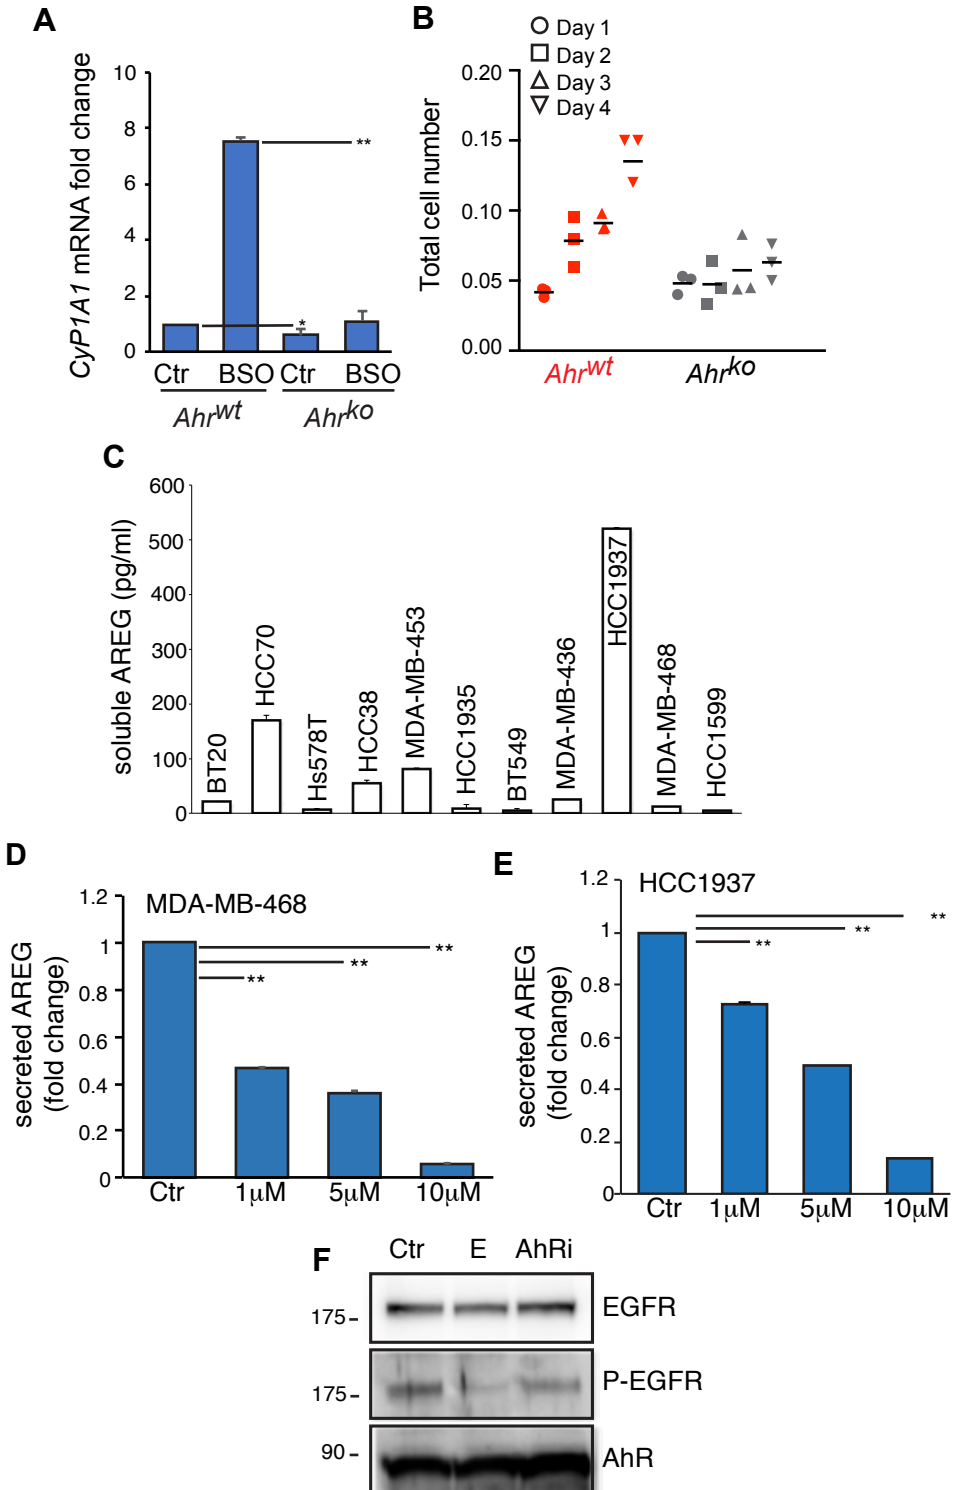

Figure S7

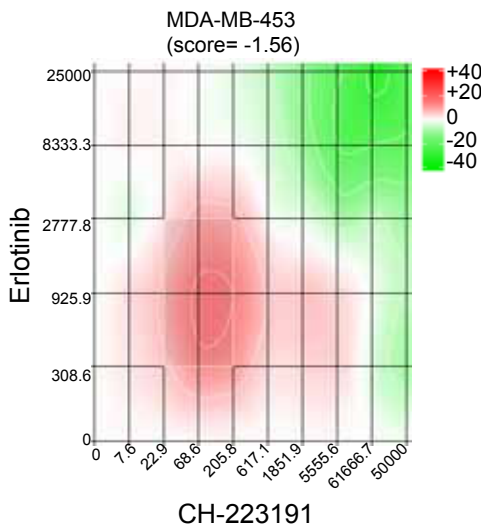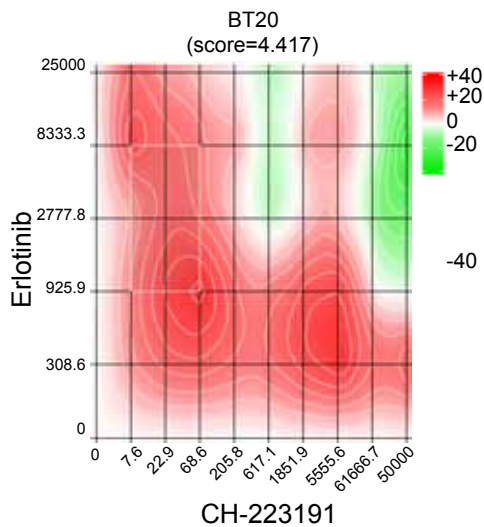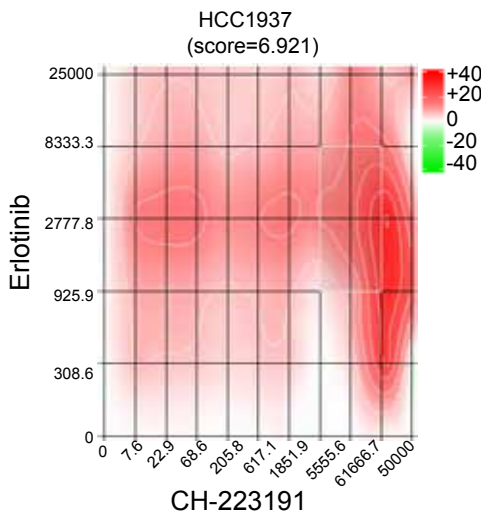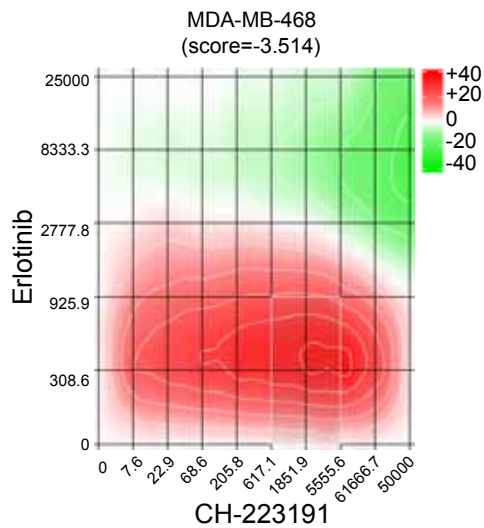

Supplementary Table 1: Primers used for qRT-PCR (m=mouse)

| <b>Gene</b>  | <b>Primer Sequence</b>   |
|--------------|--------------------------|
| mRps9 F      | GCAAGATGAAGCTGGATTAC     |
| mRps9 R      | GGGATGTTCCACCACCTG       |
| mNqo1 F      | AGGATGGGAGGTACTCGAATC    |
| mNqo1 R      | AGGCGTCCTTCCTTATATGCTA   |
| mHmox1 F     | AAGCCGAGAATGCTGAGTTCA    |
| mHmox1 R     | GCCGTGTAGATAATGGTACAAGGA |
| mCypya1-F    | CTCTTCCCTGGATGCCTTCAA    |
| mCypya1-R    | GGATGTGGCCCTTCTCAAATG    |
| mAreg-F      | GGTCTTAGGCTCAGGCCATT     |
| mAreg-R      | AGAGTTCACTGCCAGAAGGC     |
| mAhr-F       | CGGAGCGCTGCTTCCTCCAC     |
| mAhr-R       | GCTGCCCTTTGGCATCACAACC   |
| mEgf-F       | AGGATCCTGACCCCGAACTT     |
| mEgf-R       | ACAGCCGTGATTCTGAGTGG     |
| mEpgn-F      | TGGCTCTGGGGTTCTGATA      |
| mEpgn-R      | TGTAGTCAGCTTCGGTGTTGT    |
| mEreg-F      | TGCTTTGTCTAGGTTCCCACC    |
| mEreg-R      | CGGGGATCGTCTTCCATCTG     |
| mHbegf-F     | TTTCTGGCCGCAGTGTTGTC     |
| mHbegf-R     | GTGGGTAGCAGCTGGTTTGT     |
| mNrg1-F      | GCAAAGAAGGCAGAGGCAAG     |
| mNrg1-R      | AATCTGGGAGGCAATGCTGG     |
| mNrg2-F      | CACTCTGTCATCCTGGTCGG     |
| mNrg2-R      | TCAGCCTTTTGCTTAGGATCTGG  |
| mNrg3-F      | CCTATCAAGCACACAGCCC      |
| mNrg3-R      | CCTGACCTCTATCCCTTGGC     |
| mNrg4-F      | TACGACGAGAGAAGTCCCAG     |
| mNrg4-R      | TAGCAGGGTGCAAGGTCAAC     |
| mTgf_alpha_F | TAGCGCTGGGTATCCTGTTAG    |
| mTgf_alpha_R | GAGTGTGGGAATCTGGGCAC     |
| mEgfr-F      | CACGCCAACTGTACCTATGGATGT |
| mEgfr-R      | GGCCCAGAGGATTTGGAAGAA    |
| mErbB2-F     | GGCACTGTCTACAAGGGCAT     |
| mErbB2-R     | GAGGCGGGACACATATGGAG     |
| mErbB3-F     | CACCCAAGGGTGTAAGGGAC     |
| mErbB3-R     | CGCTCCAAGTAGCGTCTCAT     |
| mErbB4-F     | GGACGGGCCATTCCAATTTA     |
| mErbB4-R     | AAGGGCTCTACCAGCTCTGT     |

SI Appendix Table 2: Primers used for CHIP-qPCR (m=mouse)

|               |                      |
|---------------|----------------------|
| mAreg_XRE_F   | ttctccccgcgtaatcagg  |
| mAreg_XRE_R   | gccgggagggtactactcaa |
| mCyp1a1_XRE_F | caggcaacacagagaagtcg |
| mCyp1a1_XRE_R | aagcatcacccttgtagcc  |
